# Supplementary material for: Facile stabilization of a cyclodextrin metal–organic framework under humid environment via hydrogen sulfide treatment
Source: Royal Society of Chemistry journal article supplement (doi:10.1039/c9ra03079d), 2019-01-01
Supplement: c9ra03079d1.pdf [file c9ra03079d1.pdf]

## **Facile stabilization of cyclodextrin metal-organic framework under humid environment by hydrogen sulfide treatment**

Duo Ke<sup>a,c</sup>, Jun-Feng Feng<sup>a</sup>, Di Wu<sup>b</sup>, Jun-Bo Hou<sup>b</sup>, Xiao-Qin Zhang<sup>b</sup>, Bang-Jing Li<sup>\*,a</sup> and Sheng Zhang<sup>\*,b</sup>

<sup>a</sup> Key Laboratory of Mountain Ecological Restoration and Bioresource Utilization, Chengdu Institute of Biology, Chinese Academy of Sciences, Chengdu 610041, China. E-mail: [libj@cib.ac.cn](mailto:libj@cib.ac.cn)

<sup>b</sup>State Key Laboratory of Polymer Materials Engineering (Sichuan University), Polymer Research Institute of Sichuan University, Chengdu 610065, China. E-mail: [zslbj@163.com](mailto:zslbj@163.com)

<sup>c</sup>University of Chinese Academy of Sciences, Beijing 100049, China

E-mail: [libj@cib.ac.cn](mailto:libj@cib.ac.cn) and [zslbj@163.com](mailto:zslbj@163.com)

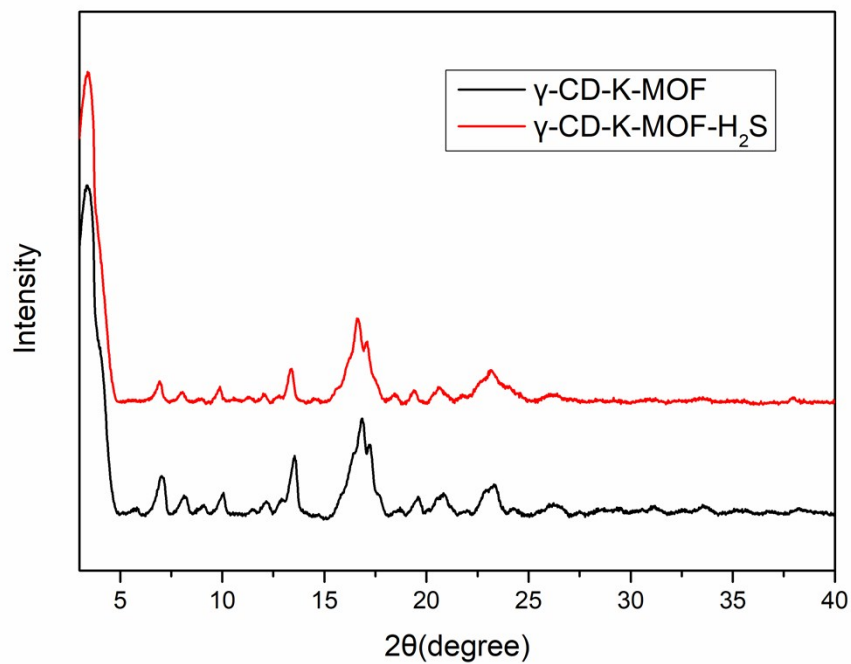

Fig.S1 The XRD pattern of  $\gamma$ -CD-K-MOF and  $\gamma$ -CD-K-MOF- $H_2S$

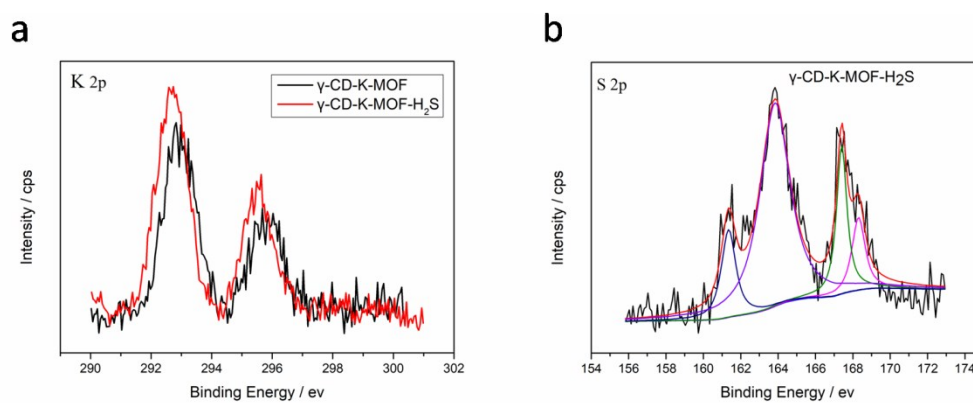

Fig. S2 XPS spectra for (a) K 2p of  $\gamma$ -CD-K-MOF and  $\gamma$ -CD-MOF- $H_2S$ ; (b) S 2p of  $\gamma$ -CD-K-MOF- $H_2S$

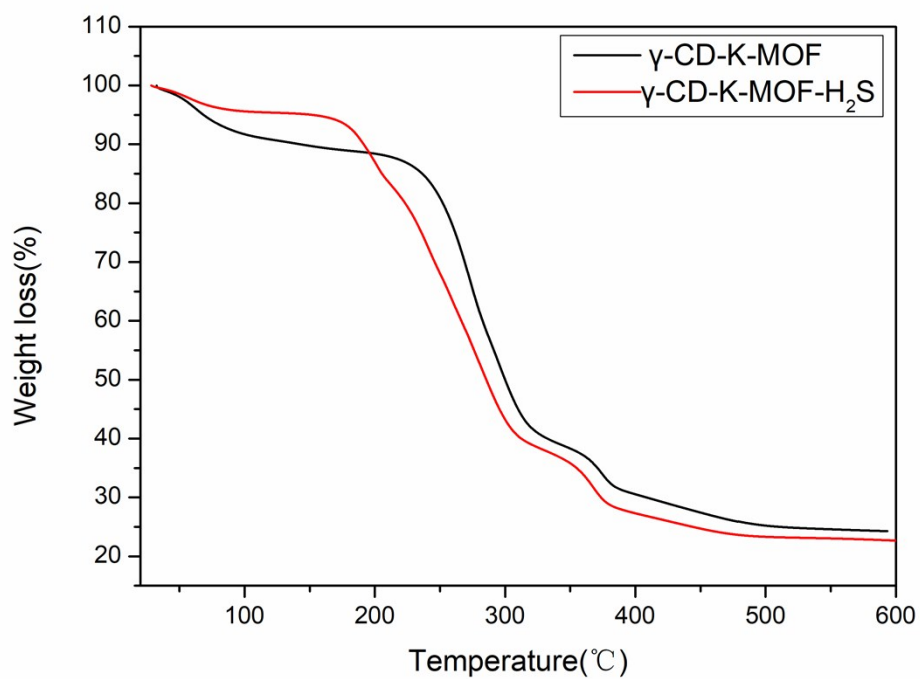

Fig. S3 TGA curves for  $\gamma$ -CD-K-MOF and  $\gamma$ -CD-K-MOF- $H_2S$

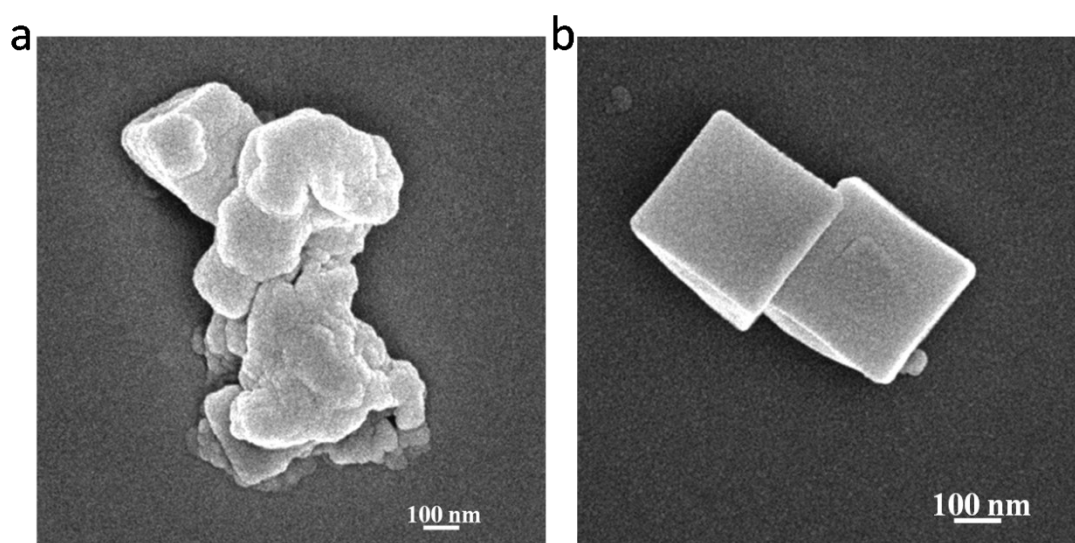

Fig. S4 SEM image of  $\gamma$ -CD-K-MOF (a) and  $\gamma$ -CD-K-MOF- $H_2S$  (b) after exposure to humidity (RH 92%) for 5 days

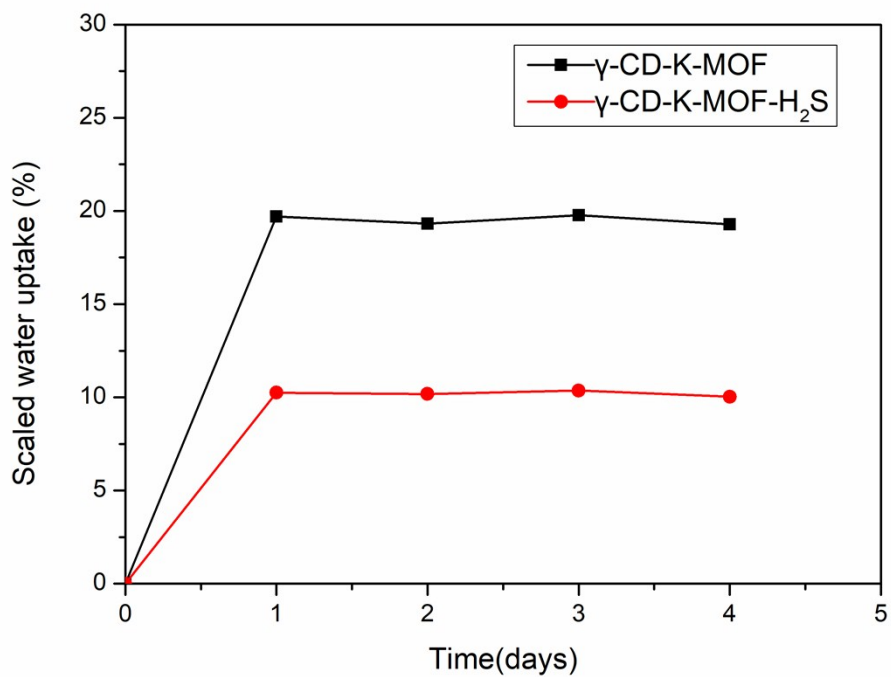

Fig. S5 Water adsorption curves of the dry  $\gamma$ -CD-K-MOF and  $\gamma$ -CD-K-MOF-H<sub>2</sub>S on exposure to an atmosphere of 92% humidity at 293 K and 1 atm

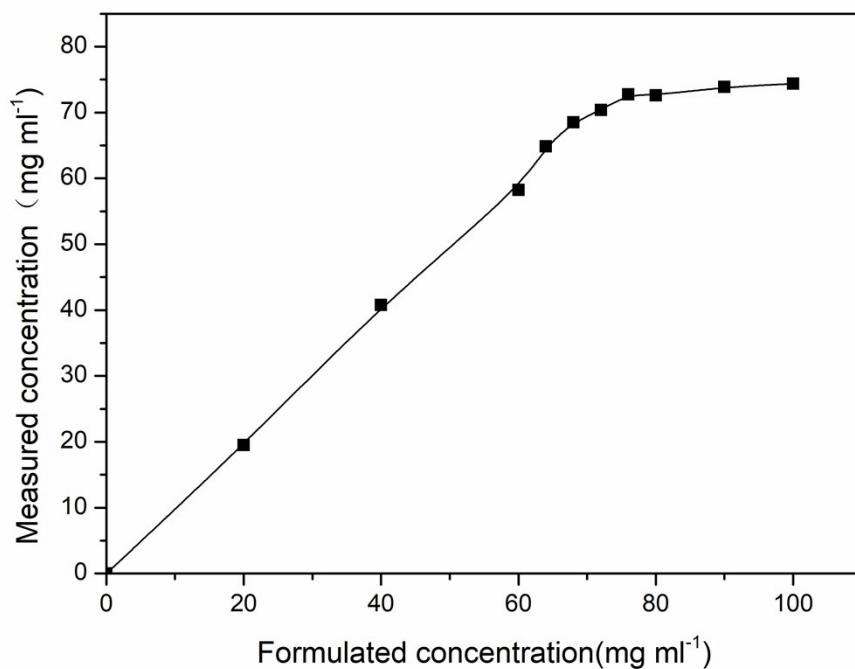

Fig. S6 Equilibrium solubility curve of  $\gamma$ -CD-K-MOF at 293K

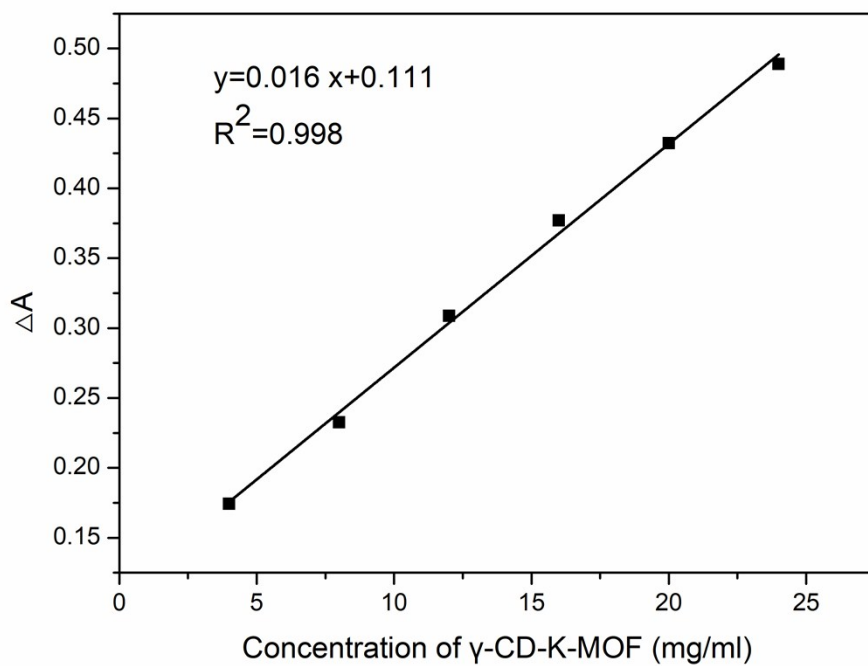

Fig. S7 Calibration curve for  $\gamma$ -CD-K-MOF in aqueous solution

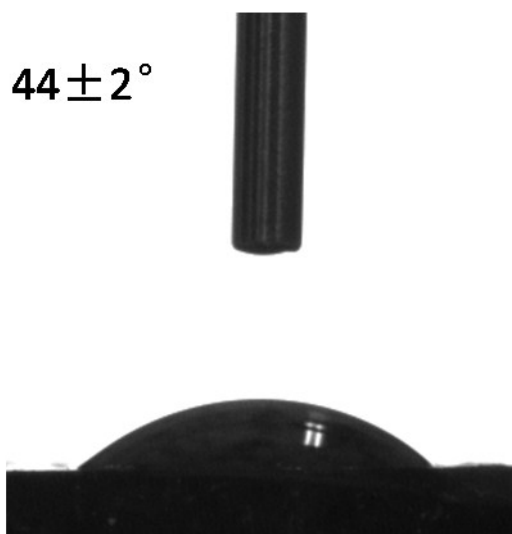

Fig. S8 The water contact angel of  $\gamma$ -CD-K-MOF/ $H_2S$

Table S1 The saturated adsorption capacity of  $\gamma$ -CD-K-MOF and  $\gamma$ -CD-K-MOF- $H_2S$ .

| Materials                  | Saturated adsorption capacity<br>(mg/g) |
|----------------------------|-----------------------------------------|
| $\gamma$ -CD-K-MOF         | 36.71                                   |
| $\gamma$ -CD-K-MOF- $H_2S$ | 14.48                                   |
